# Supplementary material
Source: PubMed Central journal article supplement (PMC9210822)
Supplement: 13643_2022_2006_MOESM2_ESM.pdf [file 13643_2022_2006_MOESM2_ESM.pdf]

## Additional File 2

### Data extraction form and risk of bias tools

Data extraction form

#### **Identification**

|                                                                                                               |  |
|---------------------------------------------------------------------------------------------------------------|--|
| Review title or ID                                                                                            |  |
| Study ID ( <i>surname of first author and year first full report of study was published e.g. Smith 2001</i> ) |  |
| Report ID                                                                                                     |  |
| Report ID of other reports of this study including errata or retractions                                      |  |
| Notes                                                                                                         |  |

#### **General Information**

|                                                                |  |
|----------------------------------------------------------------|--|
| Date form completed ( <i>dd/mm/yyyy</i> )                      |  |
| Name/ID of person extracting data                              |  |
| Reference citation                                             |  |
| Study author contact details                                   |  |
| Publication type ( <i>e.g. full report, abstract, letter</i> ) |  |
| Notes:                                                         |  |

#### **Study Eligibility**

| Study Characteristics | Eligibility criteria<br><i>(Insert inclusion criteria for each characteristic as defined in the Protocol)</i> | Eligibility criteria met? |                          |                          | Location in text or source ( <i>pg &amp; ¶/fig/table/other</i> ) |
|-----------------------|---------------------------------------------------------------------------------------------------------------|---------------------------|--------------------------|--------------------------|------------------------------------------------------------------|
|                       |                                                                                                               | Yes                       | No                       | Unclear                  |                                                                  |
| Type of study         | Randomised Controlled Trial                                                                                   | <input type="checkbox"/>  | <input type="checkbox"/> | <input type="checkbox"/> |                                                                  |
|                       | Quasi-randomised Controlled Trial                                                                             | <input type="checkbox"/>  | <input type="checkbox"/> | <input type="checkbox"/> |                                                                  |
|                       | Cluster Randomised Trial                                                                                      | <input type="checkbox"/>  | <input type="checkbox"/> | <input type="checkbox"/> |                                                                  |
|                       | Controlled Before and After Study<br>Contemporaneous data collection<br>Comparable control sites              | <input type="checkbox"/>  | <input type="checkbox"/> | <input type="checkbox"/> |                                                                  |

|                                                                                                            |                                                                                                                             |                                                                            |  |
|------------------------------------------------------------------------------------------------------------|-----------------------------------------------------------------------------------------------------------------------------|----------------------------------------------------------------------------|--|
|                                                                                                            | At least 2 x intervention and 2 x control clusters                                                                          |                                                                            |  |
|                                                                                                            | Interrupted Time Series<br>At least 3 time points before and 3 after the intervention<br>Clearly defined intervention point | <input type="checkbox"/> <input type="checkbox"/> <input type="checkbox"/> |  |
|                                                                                                            | Other design (specify):                                                                                                     | <input type="checkbox"/> <input type="checkbox"/> <input type="checkbox"/> |  |
| Types of intervention                                                                                      | TPB based intervention                                                                                                      | <input type="checkbox"/> <input type="checkbox"/> <input type="checkbox"/> |  |
|                                                                                                            | At least 2 of the 3 constructs of TPB used by the intervention                                                              | <input type="checkbox"/> <input type="checkbox"/> <input type="checkbox"/> |  |
|                                                                                                            | Intervention using multiple psychological theories with clearly measurable TPB constructs                                   | <input type="checkbox"/> <input type="checkbox"/> <input type="checkbox"/> |  |
| Types of comparison / control                                                                              | Health education not based on any psychological theory                                                                      | <input type="checkbox"/> <input type="checkbox"/> <input type="checkbox"/> |  |
|                                                                                                            | Health education based on psychological theory other than TPB                                                               | <input type="checkbox"/> <input type="checkbox"/> <input type="checkbox"/> |  |
|                                                                                                            | Treatment as usual without any structured health education                                                                  | <input type="checkbox"/> <input type="checkbox"/> <input type="checkbox"/> |  |
| Participants                                                                                               | Adults above 18 years of age, any gender and not Caucasian<br>Should have any chronic disease                               | <input type="checkbox"/> <input type="checkbox"/> <input type="checkbox"/> |  |
| Study setting                                                                                              | The geographical location of the study should be a LMIC                                                                     | <input type="checkbox"/> <input type="checkbox"/> <input type="checkbox"/> |  |
| Types of outcome measures                                                                                  | Knowledge                                                                                                                   | <input type="checkbox"/> <input type="checkbox"/> <input type="checkbox"/> |  |
|                                                                                                            | Attitude, subjective norms, perceived behavioural control                                                                   | <input type="checkbox"/> <input type="checkbox"/> <input type="checkbox"/> |  |
|                                                                                                            | Health behaviour ( <i>e.g. exercise, medication use, smoking cessation, inhaler use</i> )                                   | <input type="checkbox"/> <input type="checkbox"/> <input type="checkbox"/> |  |
| INCLUDE <input type="checkbox"/> <span style="margin-left: 300px;">EXCLUDE <input type="checkbox"/></span> |                                                                                                                             |                                                                            |  |

|                      |  |
|----------------------|--|
| Reason for exclusion |  |
| Notes:               |  |

**DO NOT PROCEED IF STUDY EXCLUDED FROM REVIEW**

### Characteristics of included studies

#### Methods

|                                                                           | Descriptions as stated in report/paper                                                          | Location in text or source (pg & ¶/fig/table/other) |
|---------------------------------------------------------------------------|-------------------------------------------------------------------------------------------------|-----------------------------------------------------|
| <b>Aim of study</b> (e.g. efficacy, equivalence, pragmatic)               |                                                                                                 |                                                     |
| <b>Design</b> (e.g. parallel, crossover, non-RCT)                         |                                                                                                 |                                                     |
| <b>Unit of allocation</b> (by individuals, cluster/ groups or body parts) |                                                                                                 |                                                     |
| <b>Start date</b>                                                         |                                                                                                 |                                                     |
| <b>End date</b>                                                           |                                                                                                 |                                                     |
| <b>Duration of participation</b> (from recruitment to last follow-up)     |                                                                                                 |                                                     |
| <b>Ethical approval needed/ obtained for study</b>                        | <input type="checkbox"/> Yes<br><input type="checkbox"/> No<br><input type="checkbox"/> Unclear |                                                     |
| <b>Notes:</b>                                                             |                                                                                                 |                                                     |

## Participants

|                                                                           | Description<br><i>Include comparative information for each intervention or comparison group if available</i> | Location in text or source (pg & ¶/fig/table/other) |
|---------------------------------------------------------------------------|--------------------------------------------------------------------------------------------------------------|-----------------------------------------------------|
| Population description (from which study participants are drawn)          |                                                                                                              |                                                     |
| Setting (including location and social context)                           |                                                                                                              |                                                     |
| Inclusion criteria                                                        |                                                                                                              |                                                     |
| Exclusion criteria                                                        |                                                                                                              |                                                     |
| Method of recruitment of participants (e.g. phone, mail, clinic patients) |                                                                                                              |                                                     |
| Informed consent obtained                                                 | <input type="checkbox"/> Yes <input type="checkbox"/> No <input type="checkbox"/> Unclear                    |                                                     |
| Total no. randomised (or total pop. at start of study for NRCTs)          |                                                                                                              |                                                     |
| Clusters (if applicable, no., type, no. people per cluster)               |                                                                                                              |                                                     |
| Baseline imbalances                                                       |                                                                                                              |                                                     |
| Withdrawals and exclusions (if not provided below by outcome)             |                                                                                                              |                                                     |
| Age                                                                       |                                                                                                              |                                                     |
| Sex                                                                       |                                                                                                              |                                                     |

|                                   |  |  |
|-----------------------------------|--|--|
| Race/Ethnicity                    |  |  |
| Severity of illness               |  |  |
| Co-morbidities                    |  |  |
| Other relevant socio-demographics |  |  |
| Subgroups measure                 |  |  |
| Subgroups reported                |  |  |
| Notes:                            |  |  |

### ***Intervention groups***

*Copy and paste table for each intervention and comparison group*

#### **Intervention Group 1**

|                                                                                                  | Description as stated in report/paper | Location in text or source ( <i>pg &amp; ¶/fig/table/other</i> ) |
|--------------------------------------------------------------------------------------------------|---------------------------------------|------------------------------------------------------------------|
| Group name                                                                                       |                                       |                                                                  |
| No. randomised to group ( <i>specify whether no. people or clusters</i> )                        |                                       |                                                                  |
| Theoretical basis ( <i>include key references</i> )                                              |                                       |                                                                  |
| Description ( <i>include sufficient detail for replication, e.g. content, dose, components</i> ) |                                       |                                                                  |
| Duration of treatment period                                                                     |                                       |                                                                  |
| Timing ( <i>e.g. frequency, duration of each episode</i> )                                       |                                       |                                                                  |
| Delivery ( <i>e.g. mechanism, medium, intensity, fidelity</i> )                                  |                                       |                                                                  |

|                                                                                                          |  |  |
|----------------------------------------------------------------------------------------------------------|--|--|
| Providers ( <i>e.g. no., profession, training, ethnicity etc. if relevant</i> )                          |  |  |
| Co-interventions                                                                                         |  |  |
| Economic information ( <i>i.e. intervention cost, changes in other costs as result of intervention</i> ) |  |  |
| Resource requirements ( <i>e.g. staff numbers, cold chain, equipment</i> )                               |  |  |
| Integrity of delivery                                                                                    |  |  |
| Compliance                                                                                               |  |  |
| Notes:                                                                                                   |  |  |

### **Outcomes**

Copy and paste table for each outcome.

#### **Outcome 1**

|                                                                                   | Description as stated in report/paper | Location in text or source ( <i>pg &amp; ¶/fig/table/other</i> ) |
|-----------------------------------------------------------------------------------|---------------------------------------|------------------------------------------------------------------|
| Outcome name                                                                      |                                       |                                                                  |
| Time points measured ( <i>specify whether from start or end of intervention</i> ) |                                       |                                                                  |
| Time points reported                                                              |                                       |                                                                  |
| Outcome definition ( <i>with diagnostic criteria if relevant</i> )                |                                       |                                                                  |
| Person measuring/reporting                                                        |                                       |                                                                  |
| Unit of measurement ( <i>if relevant</i> )                                        |                                       |                                                                  |

|                                                                                       |                                                                                           |  |
|---------------------------------------------------------------------------------------|-------------------------------------------------------------------------------------------|--|
| Scales: upper and lower limits ( <i>indicate whether high or low score is good</i> )  |                                                                                           |  |
| Is outcome/tool validated?                                                            | <input type="checkbox"/> Yes <input type="checkbox"/> No <input type="checkbox"/> Unclear |  |
| Imputation of missing data ( <i>e.g. assumptions made for ITT analysis</i> )          |                                                                                           |  |
| Assumed risk estimate ( <i>e.g. baseline or population risk noted in Background</i> ) |                                                                                           |  |
| Power ( <i>e.g. power &amp; sample size calculation, level of power achieved</i> )    |                                                                                           |  |
| Notes:                                                                                |                                                                                           |  |

**Other**

|                                                             |  |  |
|-------------------------------------------------------------|--|--|
| Study funding sources ( <i>including role of funders</i> )  |  |  |
| Possible conflicts of interest ( <i>for study authors</i> ) |  |  |
| Notes:                                                      |  |  |

***Risk of Bias assessment***

The Risk Of Bias In Non-randomized Studies – of Interventions (ROBINS-I) assessment tool

**ROBINS-I tool (Stage I): At protocol stage**

**Specify the review question**

Participants  
Experimental  
intervention  
Comparator  
Outcomes

|  |
|--|
|  |
|  |
|  |
|  |

**List the confounding domains relevant to all or most studies**

|  |
|--|
|  |
|--|

**List co-interventions that could be different between intervention groups and that could impact on outcomes**

|  |
|--|
|  |
|--|



## ROBINS-I tool (Stage II): For each study

### Specify a target randomized trial specific to the study

|                           |                                                                          |
|---------------------------|--------------------------------------------------------------------------|
| Design                    | Individually randomized / Cluster randomized / Matched (e.g. cross-over) |
| Participants              |                                                                          |
| Experimental intervention |                                                                          |
| Comparator                |                                                                          |

### Is your aim for this study...?

- to assess the effect of *assignment to* intervention
- to assess the effect of *starting and adhering to* intervention

### Specify the outcome

Specify which outcome is being assessed for risk of bias (typically from among those earmarked for the Summary of Findings table). Specify whether this is a proposed benefit or harm of intervention.

### Specify the numerical result being assessed

In case of multiple alternative analyses being presented, specify the numeric result (e.g. RR = 1.52 (95% CI 0.83 to 2.77) and/or a reference (e.g. to a table, figure or paragraph) that uniquely defines the result being assessed.





## Preliminary consideration of co-interventions

Complete a row for each important co-intervention (i) listed in the review protocol; and (ii) relevant to the setting of this particular study, or which the study authors identified as important.

*“Important” co-interventions are those for which, in the context of this study, adjustment is expected to lead to a clinically important change in the estimated effect of the intervention.*

| <b>(i) Co-interventions listed in the review protocol</b> |                                                                                                                     |                                                                                                                  |
|-----------------------------------------------------------|---------------------------------------------------------------------------------------------------------------------|------------------------------------------------------------------------------------------------------------------|
| Co-intervention                                           | Is there evidence that controlling for this co-intervention was unnecessary (e.g. because it was not administered)? | Is presence of this co-intervention likely to favour outcomes in the experimental intervention or the comparator |
|                                                           |                                                                                                                     | Favour experimental / Favour comparator / No information                                                         |
|                                                           |                                                                                                                     | Favour experimental / Favour comparator / No information                                                         |
|                                                           |                                                                                                                     | Favour experimental / Favour comparator / No information                                                         |
|                                                           |                                                                                                                     | Favour experimental / Favour comparator / No information                                                         |

| <b>(ii) Additional co-interventions relevant to the setting of this particular study, or which the study authors identified as important</b> |                                                                                                                     |                                                                                                                  |
|----------------------------------------------------------------------------------------------------------------------------------------------|---------------------------------------------------------------------------------------------------------------------|------------------------------------------------------------------------------------------------------------------|
| Co-intervention                                                                                                                              | Is there evidence that controlling for this co-intervention was unnecessary (e.g. because it was not administered)? | Is presence of this co-intervention likely to favour outcomes in the experimental intervention or the comparator |
|                                                                                                                                              |                                                                                                                     | Favour experimental / Favour comparator / No information                                                         |
|                                                                                                                                              |                                                                                                                     | Favour experimental / Favour comparator / No information                                                         |
|                                                                                                                                              |                                                                                                                     | Favour experimental / Favour comparator / No information                                                         |
|                                                                                                                                              |                                                                                                                     | Favour experimental / Favour comparator / No information                                                         |



## Risk of bias assessment

Responses underlined in green are potential markers for low risk of bias, and responses in **red** are potential markers for a risk of bias. Where questions relate only to sign posts to other questions, no formatting is used.

| Signalling questions                                                                                                                                                                                                                                                                                                                                                       | Description |
|----------------------------------------------------------------------------------------------------------------------------------------------------------------------------------------------------------------------------------------------------------------------------------------------------------------------------------------------------------------------------|-------------|
| <b>Bias due to confounding</b>                                                                                                                                                                                                                                                                                                                                             |             |
| <p>1.1 Is there potential for confounding of the effect of intervention in this study?</p> <p><b>If <u>N/PN</u> to 1.1:</b> the study can be considered to be at low risk of bias due to confounding and no further signalling questions need be considered</p> <p><b>If <u>Y/PY</u> to 1.1:</b> determine whether there is a need to assess time-varying confounding:</p> |             |
| <p>1.2. Was the analysis based on splitting participants' follow up time according to intervention received?</p> <p><b>If <u>N/PN</u>,</b> answer questions relating to baseline confounding (1.4 to 1.6)</p> <p><b>If <u>Y/PY</u>,</b> go to question 1.3.</p>                                                                                                            |             |
| <p>1.3. Were intervention discontinuations or switches likely to be related to factors that are prognostic for the outcome?</p> <p><b>If <u>N/PN</u>,</b> answer questions relating to baseline confounding (1.4 to 1.6)</p> <p><b>If <u>Y/PY</u>,</b> answer questions relating to both baseline and time-varying confounding (1.7 and 1.8)</p>                           |             |
| <b>Questions relating to baseline confounding only</b>                                                                                                                                                                                                                                                                                                                     |             |
| <p>1.4. Did the authors use an appropriate analysis method that controlled for all the important confounding domains?</p>                                                                                                                                                                                                                                                  |             |
| <p>1.5. <b>If <u>Y/PY</u> to 1.4:</b> Were confounding domains that were controlled for measured validly and reliably by the variables available in this study?</p>                                                                                                                                                                                                        |             |
| <p>1.6. Did the authors control for any post-intervention variables that could have been affected by the intervention?</p>                                                                                                                                                                                                                                                 |             |
| <b>Questions relating to baseline and time-varying confounding</b>                                                                                                                                                                                                                                                                                                         |             |
| <p>1.7. Did the authors use an appropriate analysis method that controlled for all the important confounding domains and for time-varying confounding?</p>                                                                                                                                                                                                                 |             |
| <p>1.8. <b>If <u>Y/PY</u> to 1.7:</b> Were confounding domains that were controlled for measured validly and reliably by the variables available in this study?</p>                                                                                                                                                                                                        |             |
| <b>Risk of bias judgement</b>                                                                                                                                                                                                                                                                                                                                              |             |
| <p>Optional: What is the predicted direction of bias due to confounding?</p>                                                                                                                                                                                                                                                                                               |             |
| <b>Bias in selection of participants into the study</b>                                                                                                                                                                                                                                                                                                                    |             |
| <p>2.1. Was selection of participants into the study (or into the analysis) based on participant characteristics observed after the start of intervention?</p> <p><b>If <u>N/PN</u> to 2.1:</b> go to 2.4</p>                                                                                                                                                              |             |

|                                                                                                                                                             |  |
|-------------------------------------------------------------------------------------------------------------------------------------------------------------|--|
| 2.2. <b>If Y/PY to 2.1:</b> Were the post-intervention variables that influenced selection likely to be associated with intervention?                       |  |
| 2.3 <b>If Y/PY to 2.2:</b> Were the post-intervention variables that influenced selection likely to be influenced by the outcome or a cause of the outcome? |  |
| 2.4. Do start of follow-up and start of intervention coincide for most participants?                                                                        |  |
| 2.5. <b>If Y/PY to 2.2 and 2.3, or N/PN to 2.4:</b> Were adjustment techniques used that are likely to correct for the presence of selection biases?        |  |
| <b>Risk of bias judgement</b>                                                                                                                               |  |
| Optional: What is the predicted direction of bias due to selection of participants into the study?                                                          |  |

|                                                                                                                        |  |
|------------------------------------------------------------------------------------------------------------------------|--|
| <b>Bias in classification of interventions</b>                                                                         |  |
| 3.1 Were intervention groups clearly defined?                                                                          |  |
| 3.2 Was the information used to define intervention groups recorded at the start of the intervention?                  |  |
| 3.3 Could classification of intervention status have been affected by knowledge of the outcome or risk of the outcome? |  |
| <b>Risk of bias judgement</b>                                                                                          |  |
| Optional: What is the predicted direction of bias due to classification of interventions?                              |  |

|                                                                                                                                                        |  |
|--------------------------------------------------------------------------------------------------------------------------------------------------------|--|
| <b>Bias due to deviations from intended interventions</b>                                                                                              |  |
| <b>If your aim for this study is to assess the effect of assignment to intervention, answer questions 4.1 and 4.2</b>                                  |  |
| 4.1. Were there deviations from the intended intervention beyond what would be expected in usual practice?                                             |  |
| 4.2. <b>If Y/PY to 4.1:</b> Were these deviations from intended intervention unbalanced between groups <i>and</i> likely to have affected the outcome? |  |
| <b>If your aim for this study is to assess the effect of starting and adhering to intervention, answer questions 4.3 to 4.6</b>                        |  |
| 4.3. Were important co-interventions balanced across intervention groups?                                                                              |  |
| 4.4. Was the intervention implemented successfully for most participants?                                                                              |  |
| 4.5. Did study participants adhere to the assigned intervention regimen?                                                                               |  |
| 4.6. <b>If N/PN to 4.3, 4.4 or 4.5:</b> Was an appropriate analysis used to estimate the effect of starting and adhering to the intervention?          |  |
| <b>Risk of bias judgement</b>                                                                                                                          |  |
| Optional: What is the predicted direction of bias due to deviations from the intended interventions?                                                   |  |

|                                 |
|---------------------------------|
| <b>Bias due to missing data</b> |
|---------------------------------|

|                                                                                                                                                  |  |
|--------------------------------------------------------------------------------------------------------------------------------------------------|--|
| 5.1 Were outcome data available for all, or nearly all, participants?                                                                            |  |
| 5.2 Were participants excluded due to missing data on intervention status?                                                                       |  |
| 5.3 Were participants excluded due to missing data on other variables needed for the analysis?                                                   |  |
| 5.4 If <b>PN/N to 5.1, or Y/PY to 5.2 or 5.3</b> : Are the proportion of participants and reasons for missing data similar across interventions? |  |
| 5.5 If <b>PN/N to 5.1, or Y/PY to 5.2 or 5.3</b> : Is there evidence that results were robust to the presence of missing data?                   |  |
| <b>Risk of bias judgement</b>                                                                                                                    |  |
| Optional: What is the predicted direction of bias due to missing data?                                                                           |  |

|                                                                                                |  |
|------------------------------------------------------------------------------------------------|--|
| <b>Bias in measurement of outcomes</b>                                                         |  |
| 6.1 Could the outcome measure have been influenced by knowledge of the intervention received?  |  |
| 6.2 Were outcome assessors aware of the intervention received by study participants?           |  |
| 6.3 Were the methods of outcome assessment comparable across intervention groups?              |  |
| 6.4 Were any systematic errors in measurement of the outcome related to intervention received? |  |
| <b>Risk of bias judgement</b>                                                                  |  |
| Optional: What is the predicted direction of bias due to measurement of outcomes?              |  |

|                                                                                             |  |
|---------------------------------------------------------------------------------------------|--|
| <b>Bias in selection of the reported result</b>                                             |  |
| Is the reported effect estimate likely to be selected, on the basis of the results, from... |  |
| 7.1. ... multiple outcome <i>measurements</i> within the outcome domain?                    |  |
| 7.2 ... multiple <i>analyses</i> of the intervention-outcome relationship?                  |  |
| 7.3 ... different <i>subgroups</i> ?                                                        |  |
| <b>Risk of bias judgement</b>                                                               |  |
| Optional: What is the predicted direction of bias due to selection of the reported result?  |  |

|                                                                             |  |
|-----------------------------------------------------------------------------|--|
| <b>Overall bias</b>                                                         |  |
| <b>Risk of bias judgement</b>                                               |  |
| Optional: What is the overall predicted direction of bias for this outcome? |  |



## Revised Cochrane risk-of-bias tool for randomized trials (RoB 2)

Responses underlined in green are potential markers for low risk of bias, and responses in **red** are potential markers for a risk of bias. Where questions relate only to sign posts to other questions, no formatting is used.

| Signalling questions                                                                                       | Comments | Response options                                                                               |
|------------------------------------------------------------------------------------------------------------|----------|------------------------------------------------------------------------------------------------|
| 1.1 Was the allocation sequence random?                                                                    |          | <u>Y</u> / PY / PN / N / NI                                                                    |
| 1.2 Was the allocation sequence concealed until participants were enrolled and assigned to interventions?  |          | <u>Y</u> / PY / PN / N / NI                                                                    |
| 1.3 Did baseline differences between intervention groups suggest a problem with the randomization process? |          | Y / PY / <u>PN</u> / N / NI                                                                    |
| Risk-of-bias judgement                                                                                     |          | Low / High / Some concerns                                                                     |
| Optional: What is the predicted direction of bias arising from the randomization process?                  |          | NA / Favours experimental / Favours comparator / Towards null / Away from null / Unpredictable |

### *Domain 1: Risk of bias arising from the randomization process*

*Domain 2: Risk of bias due to deviations from the intended interventions  
(effect of assignment to intervention)*

| Signalling questions                                                                                                                                                          | Comments |
|-------------------------------------------------------------------------------------------------------------------------------------------------------------------------------|----------|
| 2.1. Were participants aware of their assigned intervention during the trial?                                                                                                 |          |
| 2.2. Were carers and people delivering the interventions aware of participants' assigned intervention during the trial?                                                       |          |
| 2.3. If <b>Y/PY/NI</b> to 2.1 or 2.2: Were there deviations from the intended intervention that arose because of the trial context?                                           |          |
| 2.4 If <b>Y/PY</b> to 2.3: Were these deviations likely to have affected the outcome?                                                                                         |          |
| 2.5. If <b>Y/PY/NI</b> to 2.4: Were these deviations from intended intervention balanced between groups?                                                                      |          |
| 2.6 Was an appropriate analysis used to estimate the effect of assignment to intervention?                                                                                    |          |
| 2.7 If <b>N/PN/NI</b> to 2.6: Was there potential for a substantial impact (on the result) of the failure to analyse participants in the group to which they were randomized? |          |
| <b>Risk-of-bias judgement</b>                                                                                                                                                 |          |
| Optional: What is the predicted direction of bias due to deviations from intended interventions?                                                                              |          |

*Domain 2: Risk of bias due to deviations from the intended interventions  
(effect of adhering to intervention)*

| Signalling questions                                                                                                                                     | Comments |
|----------------------------------------------------------------------------------------------------------------------------------------------------------|----------|
| 2.1. Were participants aware of their assigned intervention during the trial?                                                                            |          |
| 2.2. Were carers and people delivering the interventions aware of participants' assigned intervention during the trial?                                  |          |
| 2.3. [If applicable:] If <b>Y/PY/NI</b> to 2.1 or 2.2: Were important non-protocol interventions balanced across intervention groups?                    |          |
| 2.4. [If applicable:] Were there failures in implementing the intervention that could have affected the outcome?                                         |          |
| 2.5. [If applicable:] Was there non-adherence to the assigned intervention regimen that could have affected participants' outcomes?                      |          |
| 2.6. If <b>N/PN/NI</b> to 2.3, or <b>Y/PY/NI</b> to 2.4 or 2.5: Was an appropriate analysis used to estimate the effect of adhering to the intervention? |          |
| <b>Risk-of-bias judgement</b>                                                                                                                            |          |
| Optional: What is the predicted direction of bias due to deviations from intended interventions?                                                         |          |

### Domain 3: Missing outcome data

| Signalling questions                                                                                    | Comments |
|---------------------------------------------------------------------------------------------------------|----------|
| 3.1 Were data for this outcome available for all, or nearly all, participants randomized?               |          |
| 3.2 If <b>N/PN/NI</b> to 3.1: Is there evidence that the result was not biased by missing outcome data? |          |
| 3.3 If <b>N/PN</b> to 3.2: Could missingness in the outcome depend on its true value?                   |          |
| 3.4 If <b>Y/PY/NI</b> to 3.3: Is it likely that missingness in the outcome depended on its true value?  |          |
| Risk-of-bias judgement                                                                                  |          |
| Optional: What is the predicted direction of bias due to missing outcome data?                          |          |

*Domain 4: Risk of bias in measurement of the outcome*

| Signalling questions                                                                                                            | Comments |
|---------------------------------------------------------------------------------------------------------------------------------|----------|
| 4.1 Was the method of measuring the outcome inappropriate?                                                                      |          |
| 4.2 Could measurement or ascertainment of the outcome have differed between intervention groups?                                |          |
| 4.3 If <b>N/PN/NI</b> to 4.1 and 4.2: Were outcome assessors aware of the intervention received by study participants?          |          |
| 4.4 If <b>Y/PY/NI</b> to 4.3: Could assessment of the outcome have been influenced by knowledge of intervention received?       |          |
| 4.5 If <b>Y/PY/NI</b> to 4.4: Is it likely that assessment of the outcome was influenced by knowledge of intervention received? |          |
| Risk-of-bias judgement                                                                                                          |          |
| Optional: What is the predicted direction of bias in measurement of the outcome?                                                |          |

*Domain 5: Risk of bias in selection of the reported result*

| Signalling questions                                                                                                                                                                              | Comments |
|---------------------------------------------------------------------------------------------------------------------------------------------------------------------------------------------------|----------|
| <p><b>5.1</b> Were the data that produced this result analysed in accordance with a pre-specified analysis plan that was finalized before unblinded outcome data were available for analysis?</p> |          |
| <p>Is the numerical result being assessed likely to have been selected, on the basis of the results, from...</p>                                                                                  |          |
| <p><b>5.2.</b> ... multiple eligible outcome measurements (e.g. scales, definitions, time points) within the outcome domain?</p>                                                                  |          |
| <p><b>5.3</b> ... multiple eligible analyses of the data?</p>                                                                                                                                     |          |
| <p><b>Risk-of-bias judgement</b></p>                                                                                                                                                              |          |
| <p>Optional: What is the predicted direction of bias due to selection of the reported result?</p>                                                                                                 |          |

Overall risk of bias

|                                                                             |  |
|-----------------------------------------------------------------------------|--|
| <b>Risk-of-bias judgement</b>                                               |  |
| Optional: What is the overall predicted direction of bias for this outcome? |  |
